# Supplementary material for: TMEM11 regulates cardiomyocyte proliferation and cardiac repair via METTL1-mediated m7G methylation of ATF5 mRNA
Source: PubMed Central journal article supplement (PMC10307882; doi:10.1038/s41418-023-01179-0), 2023-06-07

**Figure 1 a**

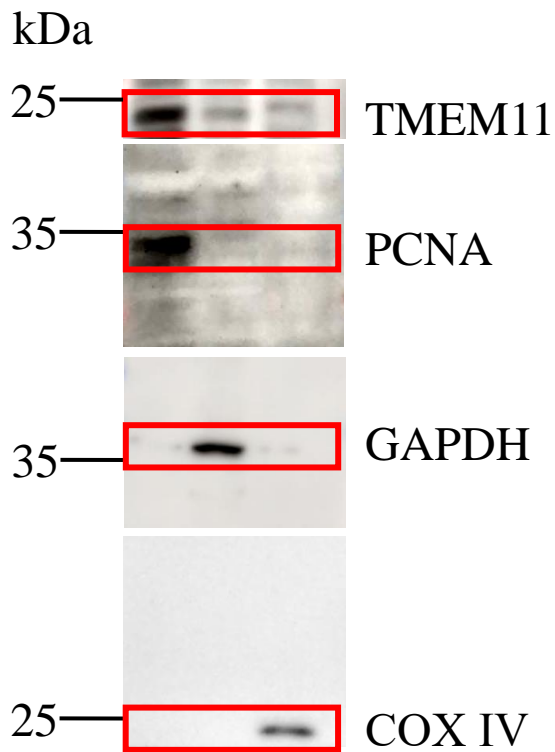

**Figure 1 b**

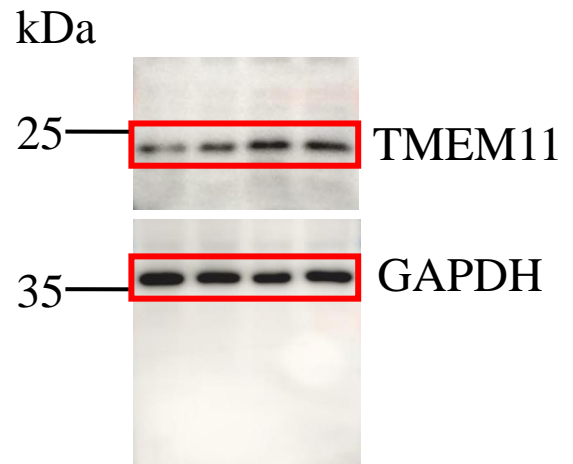

**Figure 1 c**

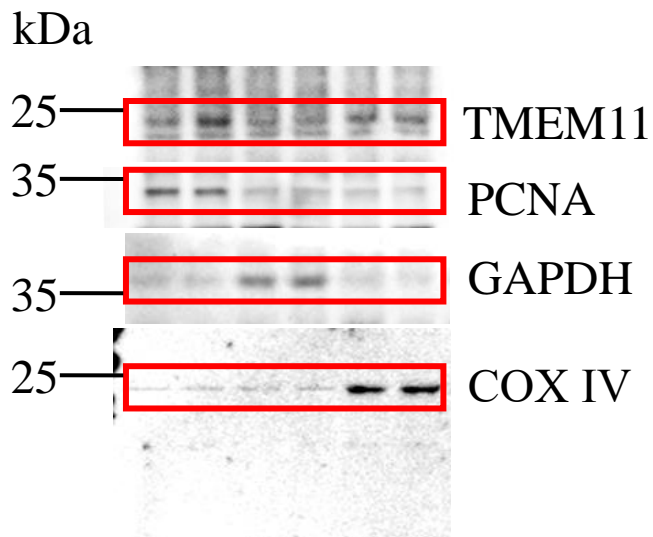

**Figure 1 d**

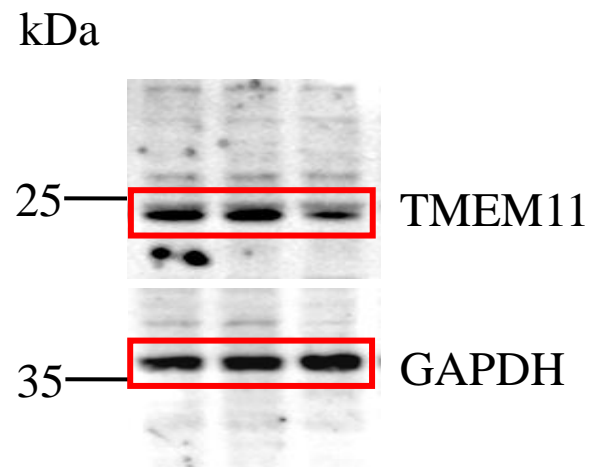

**Figure 1 i**

kDa

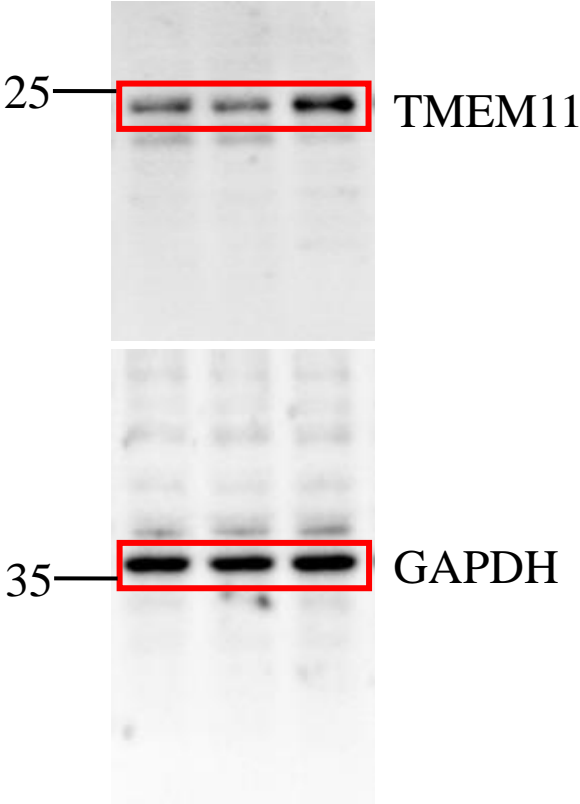

**Figure 2 a**

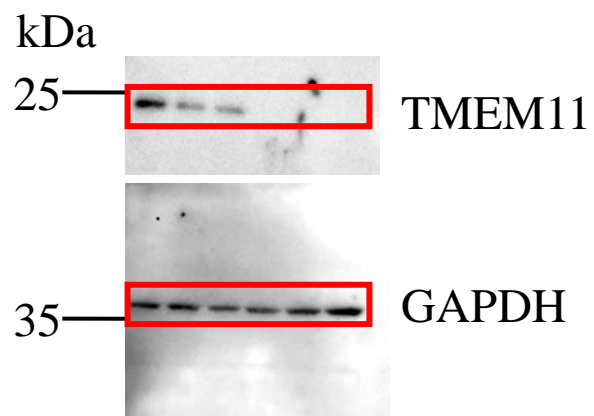

**Figure 5 a**

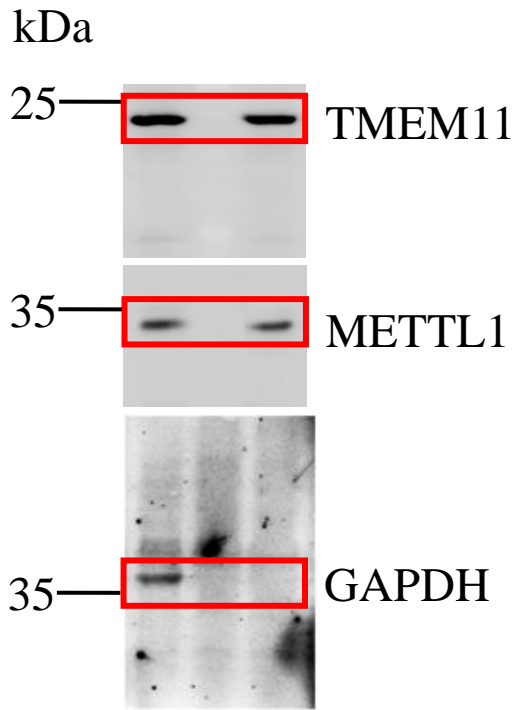

**Figure 5 b**

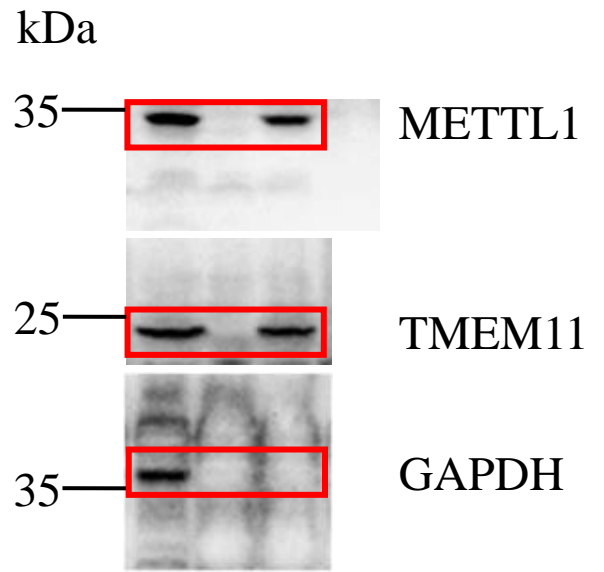

**Figure 6 b**

kDa

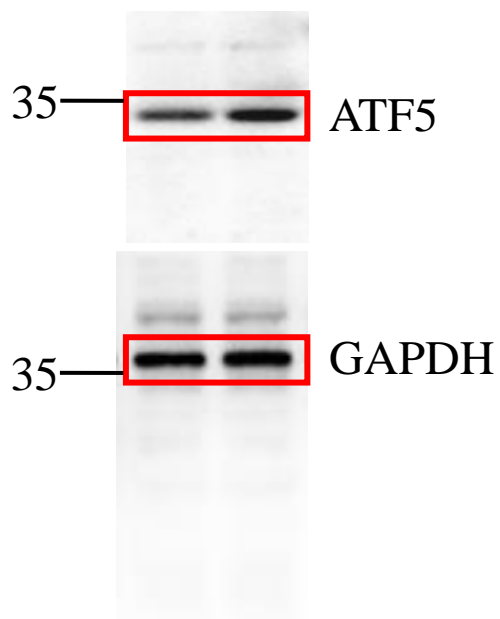

**Figure 6 e**

kDa

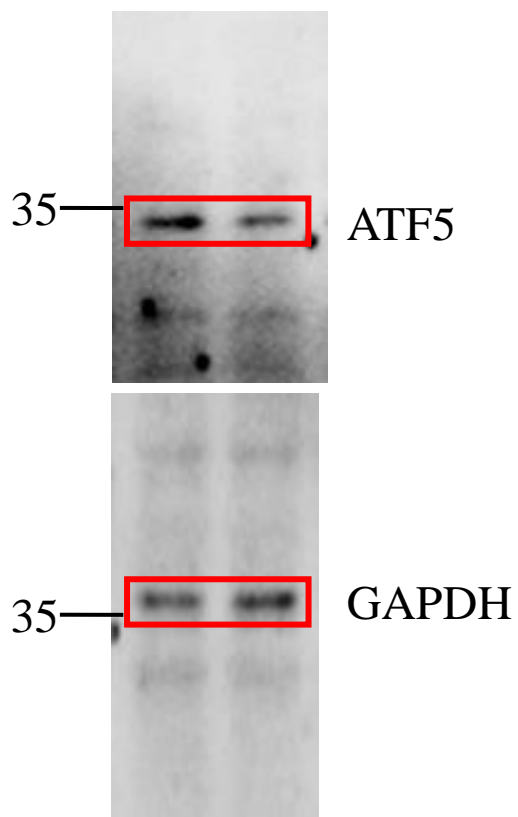

**Figure 7 c**

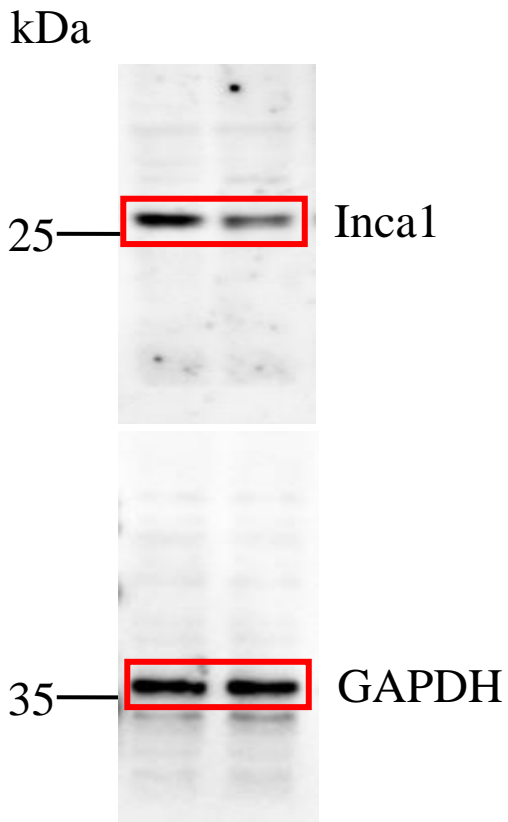

**Figure 7 f**

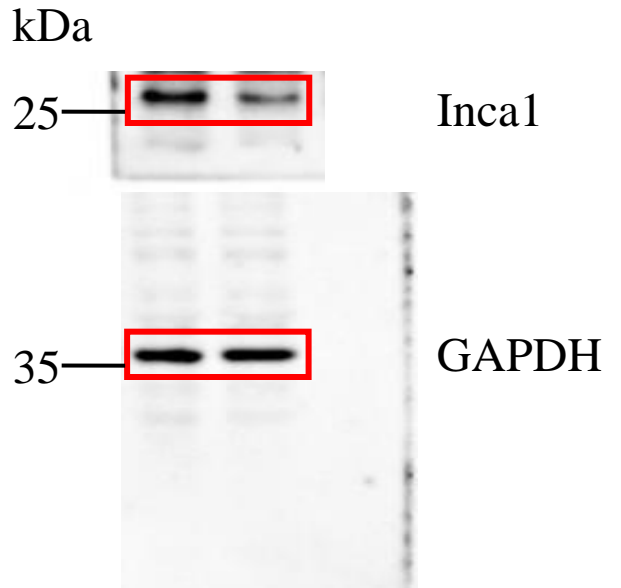

**Figure 7 g**

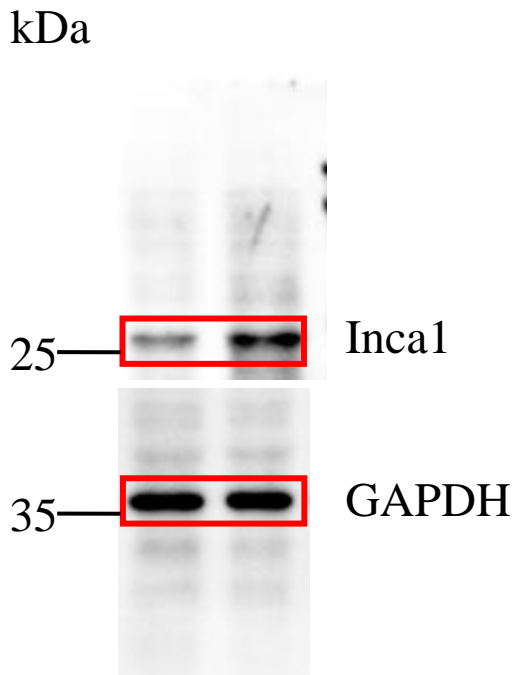

**Figure 7 h**

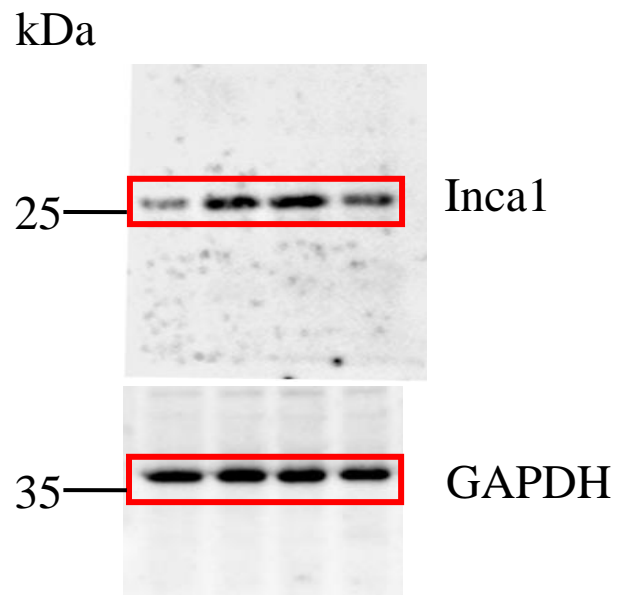

**Supplementary Fig. 1 b**

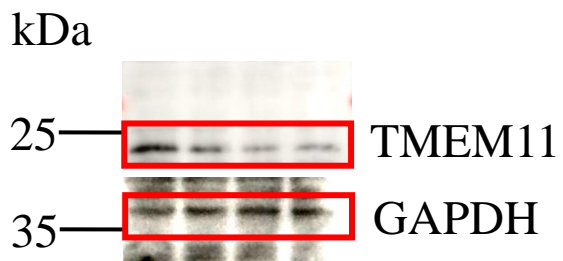

**Supplementary Fig. 1 c**

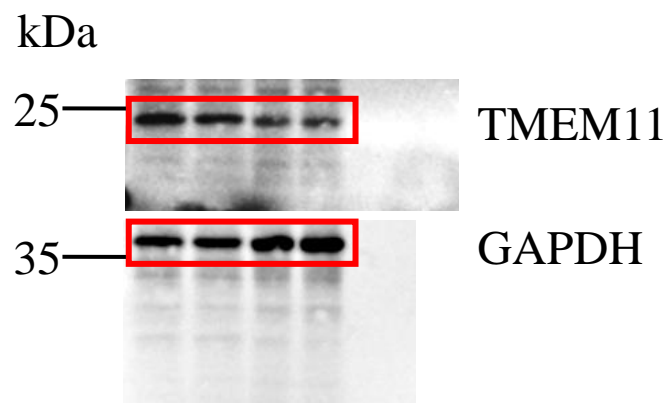

## Supplementary Fig. 2 d

kDa

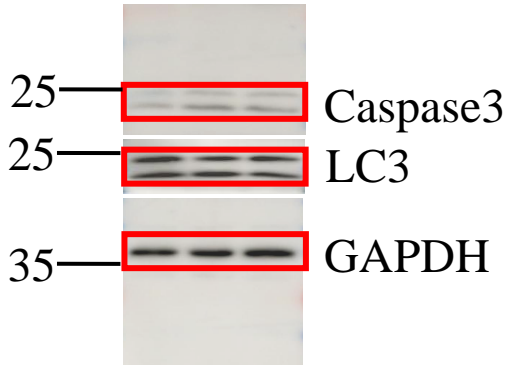



**Supplementary Fig. 4 d**

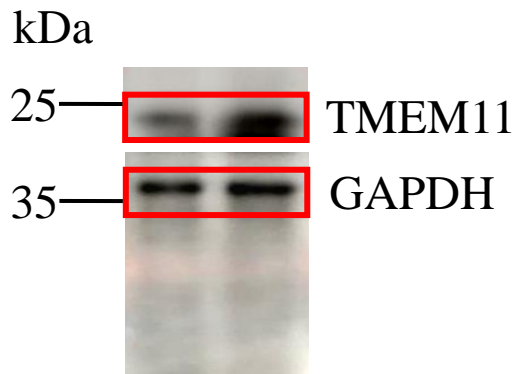

**Supplementary Fig. 4 e**

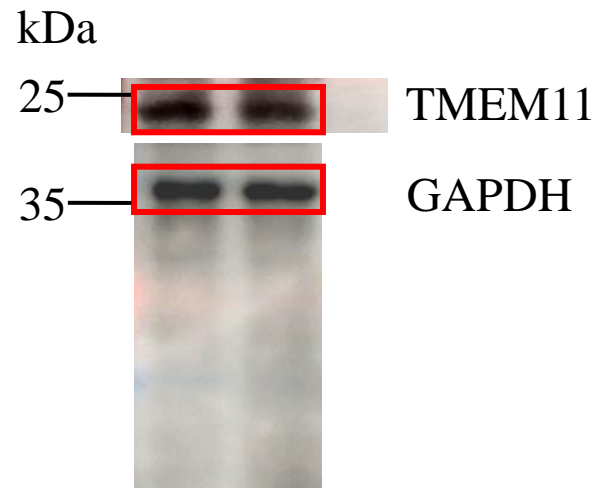

## Supplementary Fig. 5 a

kDa

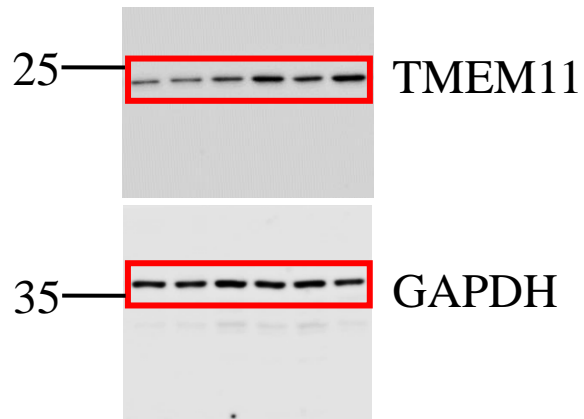

**Supplementary Fig. 7 a**

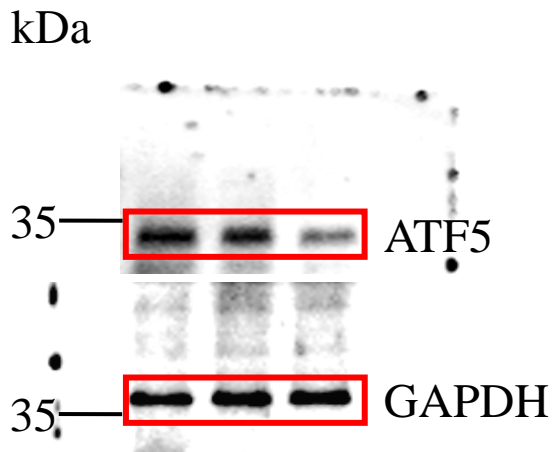

**Supplementary Fig. 7 c**

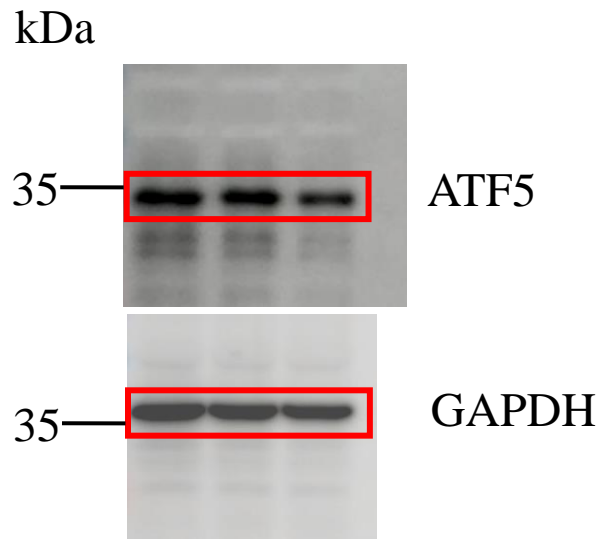

**Supplementary Fig. 7 f**

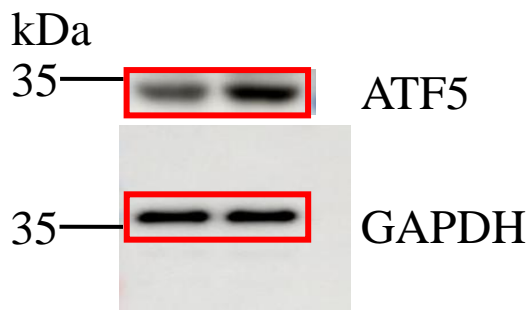

**Supplementary Fig. 7 g**

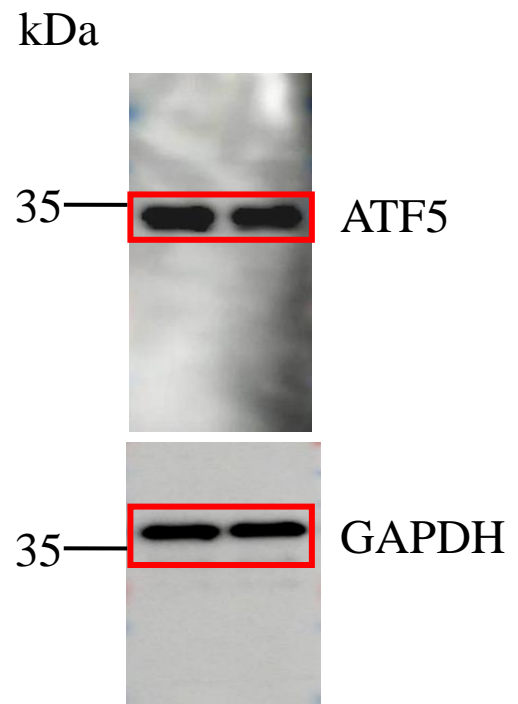

**Supplementary Fig. 7 i**

kDa

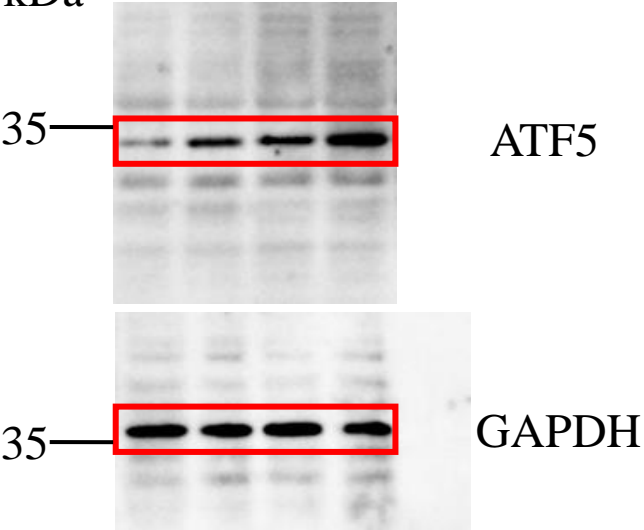

**Supplementary Fig. 8 d**

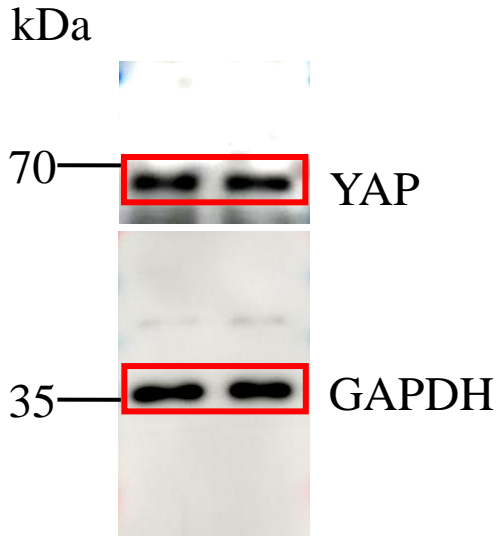

**Supplementary Fig. 8 e**

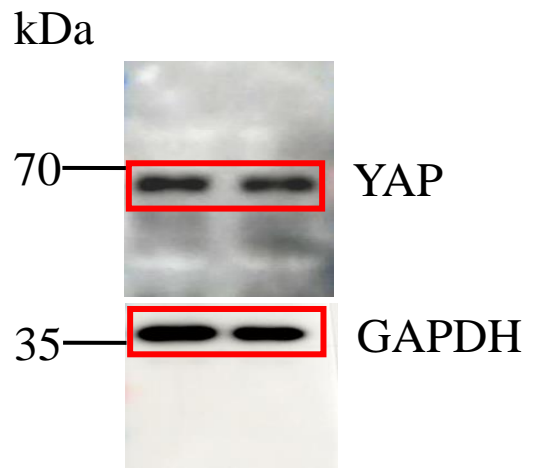

**Supplementary Fig. 8 f**

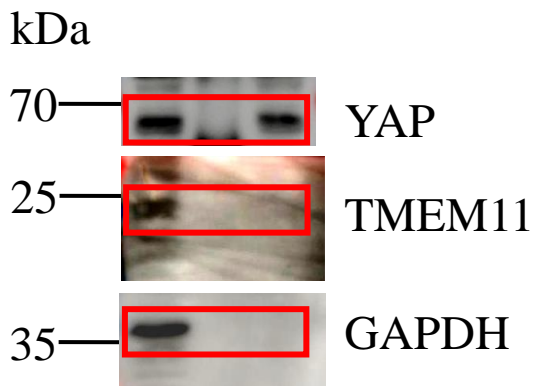

# Supplementary Fig. 9 d

kDa

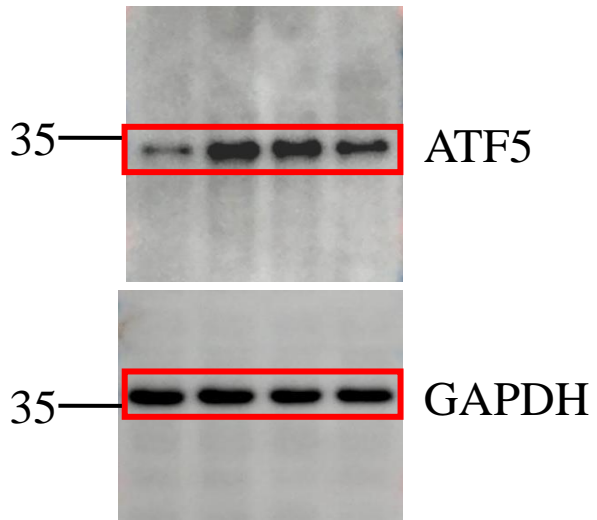

Supplement: 41418_2023_1179_MOESM15_ESM.pdf [file 41418_2023_1179_MOESM15_ESM.pdf]
